# Supplementary material
Source: publisher figshare collection journal article supplement (https://acs.figshare.com/ndownloader/files/25756995)
Supplement: Supplementary file 1 [file 25756995]

## Sheet: Comparison
Table S8A: Listing of the proteins identified as deregulated in Apis mellifera infected by Nosema ceranae in two articles and comparison with our findings
The table of identified deregulated proteins fom each article was extracted, reproduced below, and annotated with our own data
The four proteins from Nosema have been highlighted in bold,
Article 1
C. Vidau et al. / Journal of Invertebrate Pathology 121 (2014) 89–96					Significant thresholds for our data
Multiple accession numbers for some spots (multiple proteins identified). We kept the initial order of proteins in each column and separated them with '/'.					Ratio >2 or <0.5	p-value <0.05
Table 1	10-days p.i.				4-days p.i.
Reference protein NCBI	Modulated	Name	Accession Uniprot	Found by our analysis	Ratio in our samples	p-value	Modulation
gi|58585108	Down	major royal jelly protein 2 precursor [Apis mellifera]	O77061	No
gi|58585098	Down	major royal jelly protein 1 precursor [Apis mellifera]	O18330	No
gi|288872651	Down	major royal jelly protein [Apis mellifera]	D3Y5T0	No
gi|58585164	Down	alpha-glucosidase precursor [Apis mellifera]	Q17058	No
gi|94400901	Up	alpha-glucosidase precursor [Apis mellifera]	Q25BT7	No
gi|48120572	Up	NADH dehydrogenase [ubiquinone] 1 alpha subcomplex subunit 5 [Apis mellifera]	A0A088A390	No
gi|48103506	Up	glutaredoxin 3 [Apis mellifera]	NCBI accession removed (further genome annotation); now NCBI XP_016772335 and Uniprot A0A088ADE6	No
gi|237681308	Up	glutathione S-transferase S1 [Apis mellifera]	C3VMN1	No
gi|48101936	Up	acyl-protein thioesterase 1 [Apis mellifera]	A0A088AHK0	No
gi|48096769	Down	proteasome subunit alpha type-3 [Apis mellifera]	A0A088AP06	No
gi|66531434	Down	V-type proton ATPase subunit B [Apis mellifera]	A0A088ADH1	No
gi|156538985	Up	tubulin beta-1 chain [Nasonia vitripennis]	NCBI accession removed	No (1)
gi|66530527	Down	annexin B9 isoform X2 [Apis mellifera]	NCBI accession changed, now XP_006569793 - A0A088AJH1 in Uniprot	No
gi|110749004	Up	CHK domain-containing protein [Apis mellifera]	A0A087ZPX5	Found in NF	0.016	0.54	Modulation not confirmed by statistical test
gi|110749179	Down	putative serine protease K12H4.7 [Apis mellifera]	A0A088A3L2	No
gi|110761202 / gi|48095159 / gi|110768518	Up	uncharacterized protein LOC552843 [Apis mellifera] / chymotrypsin-1 [Apis mellifera] /natterin-3-like	A0A088A0Z6 / A0A088AGZ8 / NCBI accession removed	Found in NF / No / No (1)	0.059	0.013	Downregulated
gi|58585090 / gi|66548188	Up	glucose oxidase [Apis mellifera] / peroxiredoxin 1 [Apis mellifera] (Thioredoxin domain-containing protein)	Q9U8X6 / NCBI accession removed, Uniprot A0A087ZND2	No / Found in NA, NF, NC2 (1)	0.058	0.00719249	Downregulated
gi|242023574 / gi|58585098	Down	ATP synthase subunit beta, putative [Pediculus humanus corporis] / major royal jelly protein 1 precursor [Apis mellifera]	E0W1G3 / O18330	No / No
gi|58585164 / gi|229892210	Down	alpha-glucosidase precursor [Apis mellifera] / heat shock protein cognate 4 [Apis mellifera]	Q17058 / not found	No / No
gi|89885579 / gi|229892210	Down	alpha-glucosidase precursor [Apis mellifera] / heat shock protein cognate 4 [Apis mellifera]	Q25BT6 / not found	No / No
gi|300705607 / gi|94400901	Up	heat shock protein 70 [Nosema ceranae] / alpha-glucosidase precursor [Apis mellifera]	NCBI reference discontinued, Uniprot C4VB85 / Q25BT7	No (1) / No
gi|297591985 / see above	Up	actin related protein 1 [Apis mellifera]	A0A087ZZF3	Found in NF	0.047	0.041	Downregulated
(1) As the original NCBI entry has become obsolete, an up-to-date NCBI entry was researched by using the sequence from the obsolete entry in Blastp. This new entry accession was used to obtain a Uniprot accession. See next spreadsheet "Blastp protein sequence" for the result of this search.
Article 2
C. Kurze et al. / Insect Biochemistry and Molecular Biology 79 (2016) 42e49 45
Table 1	10 days P.I.				4-days p.i.
Reference protein	Modulated (1)	Name	Accession number Uniprot	Found by our analysis	Ratio in our samples	p-value	Modulation
XP_392397.3	Down in Ctl - Toler/Sen	alpha,alpha-trehalose-phosphate synthase	Not found	No (2)
XP_394885.1	Down in Ctl - Toler/Sen	NADH dehydrogenase [ubiquinone] iron-sulfur protein 3, mitochondrial [Apis mellifera]	A0A088A6D6	No
XP_006568106.1	Up in tolerant infected, down in sensitive infected	pyruvate carboxylase, mitochondrial isoform X1 [Apis mellifera]	A0A087ZNH6	No
XP_001121817.1	Up in infected	cytochrome c oxidase subunit 6A1, mitochondrial [Apis mellifera]	A0A088AQ34	No
NP_001035349.1	Up in sensitive infected	alpha-glucosidase precursor [Apis mellifera]	Q25BT7	No
XP_006564892.1	Up Tolerant vs Sensitive	ATP synthase subunit beta, mitochondrial [Apis mellifera]	A0A088AMB8	Found in NF	0.063	0.0361738	Downregulated
XP_006570759.1	Down in Tolerant Control	glutathione peroxidase-like 1 isoform X1 [Apis mellifera]	A0A088A7Z8	No
NP_001164444.1	Up in Tolerant infected vs Control	peroxiredoxin-like protein [Apis mellifera] (Thioredoxin domain-containing protein)	A0A087ZRJ5	Found in NA, NF, NC2	0.058	0.00719249	Downregulated
XP_624150.2	Up in Tolerant infected vs Sensitive	deaminated glutathione amidase [Apis mellifera]	Not found	No
XP_397201.2	Up in infected	complement component 1 Q subcomponent-binding protein, mitochondrial [Apis mellifera]	A0A088A0G9	No
XP_624645.2	Down in Tolerant vs Sensitive	40S ribosomal protein S12	NCBI accession removed, Uniprot V9ILJ0	No (2)
XP_006570873.1	Up in Infected	zinc transporter ZIP13 homolog isoform X1 [Apis mellifera]	Not found	No
NP_001011583.1	Up in Sensitive Infected	chemosensory protein 3 precursor [Apis mellifera]	Q8I6X7	No
XP_002995209.1	Up in infected	hypothetical protein AAJ76_2000149161 [Nosema ceranae]	NCBI accession removed; Swissprot A0A0F9ZH36	No (2)
XP_002996353.1	Up in Sensitive Infected	heat shock protein 70 [Nosema apis BRL 01]	NCBI accession removed; Swissprot T0L570	No (2)
XP_002995188.1	Up in Sensitive Infected	heat shock protein 70 [Nosema ceranae]	NCBI accession removed; Swissprot A0A0F9WFB6	No (2)
(1) Shorthand summary of the observed ratios. See the original article for the full detailed breakdown of the ratios observed for each experimental condition.
(2) As the original NCBI entry has become obsolete, an up-to-date NCBI entry was researched by using the sequence from the obsolete entry in Blastp. This new entry accession was used to obtain a Uniprot accession. See next spreadsheet "Blastp protein sequence" for the result of this search.

## Sheet: Blastp protein sequence
Table S8B: Result of Blastp search on the sequence of proteins identified in two previous articles
A number of the NCBI accession number entries provided in the result tables of these articles had become obsolete.
In order to match these proteins with our list of identiifed proteins, we first used Blastp to find an up-to-date NCBI entry for the same sequence, or a close sequence, and then retrieved an associated Uniprot accession number, when available.
Article 1
C. Vidau et al. / Journal of Invertebrate Pathology 121 (2014) 89–96
Protein	Accession in article	Message NCBI	Entry number	Name	GeneID	Full recorded sequence	Blastp on	Result	Matched protein identitiy	NCBI Accession result	Accession Uniprot
NCER_102023	gi|300705607	Record removed. This record was removed by RefSeq staff.	XP_002995188	hypothetical protein NCER_102023 [Nosema ceranae BRL01]	9422542	1 mseqsktsna igidlgttys cvgaymngkv eiitnpdgdr ttpsivafge sgniivgsaa 61 ksmytsdpas vifdakrmig rgfdddnikt ciskwpftvv rynfqtkkee aapvpgsqkv 121 idniaikiek ngktdyyapi eissrvltym kkaaetrlgt kvdsvvvtvp ayfeepqrer 181 tkeaaiiagf kpdnirllae ptaaamaygh kkteenqnie tkedilvfdl gggtfdvsvl 241 dfefstkngs vgvvkatdgn tflggvdfdn lliqyaldef kkknglspqe efkqnsvlrl 301 raevtrvkal lsstdnsqiy vpcfhgtvdl nipitrarfe flcd…	full sequence	Exact match	heat shock protein 70 [Nosema ceranae]	XP_024331167.1	C4VB85
natterin-3-like	gi|110768518	Record removed. This record was removed as a result of standard genome annotation processing.	XP_001122043.2	PREDICTED: hypothetical protein LOC726292 [Apis mellifera]	726292	1 mpgykwvryt gtryfvpgmi svgkdldgmi lvvgrayhng dmlpakvkpe hgvayvaygg 61 kehmkhefei lmpadfqwip ssnghvppda veagrtvege ilfvgrayqn gvpcvgkvpf 121 hrvfq	full sequence	Partial match 94%	natterin-3-like [Apis cerana]	XP_016914998.1	Not found
peroxiredoxin 1	gi|66548188	Record removed. This record was removed as a result of standard genome annotation processing.	XP_393445.3	PREDICTED: peroxiredoxin 1 isoform 1 [Apis mellifera]	409954	1 mapqlqkrap dfrgtavvng efkdislsdy qgkylvlffy pldfhlawvn tprkqgglge 61 mniplladks skiardygvl deesgvpfrg lfiiddkqnl rqitindlpv grsvdetlrl 121 vqafqytdkh gevcpagwkp gkktmkpdvv gskeyfkdt	full sequence	Exact match	peroxiredoxin 1 [Apis mellifera]	XP_003249289.2	A0A087ZND2
tubulin beta chain	gi|156538985	Record removed. This record was removed as a result of standard genome annotation processing.	XP_001600854.3	PREDICTED: tubulin beta chain [Nasonia vitripennis]	100116329	1 mdsvrsgpfg qifrpdnfvf gqsgagnnwa kghytegael vdsvldvvrk eaescdclqg 61 fqlthslggg tgsgmgtlli skireeypdr imntysvvps pkvsdtvvep ynatlsvhql 121 ventdetyci dnealydicf rtlklstpty gdlnhlvslt msgvttclrf pgqlnadlrk 181 lavnmvpfpr lhffmpgfap ltsrgsqqyr alsvpeltqq mfdaknmmaa cdprhgrylt 241 vaaifrgrms mkevdeqmln iqnknssyfv ewipnnvkta vcdipprglk msatfignst 301 aiqelfkris eqftamfrrk aflhwytgeg mdemefteae snmn…	full sequence	Partial match 97%	PREDICTED: tubulin beta-1 chain [Bemisia tabaci]	XP_018902682.1	Not found
Article 2
C. Kurze et al. / Insect Biochemistry and Molecular Biology 79 (2016) 42e49 45
Protein	Accession in article	Message NCBI	Entry number	Name	GeneID	Full recorded sequence	Blastp on	Result	Matched protein identitiy	NCBI Accession result	Accession Uniprot
NCER_100570	XP_002996353.1	Record removed. This record was removed by RefSeq staff.	XP_002996353.1	hypothetical protein NCER_100570 [Nosema ceranae BRL01]	9422735	1 mlqlfiialn ivkcglcvdn lnisgnlgns cmreefrnii ykdilldvnp egckdfvrti 61 fsyipvtdsi msiksdastl htlldhdaal aavvlriafr klaernpeid elaletllky 121 ffefirnsnd khakpclefc yegkdsligt pkqvlctllh crglrnifev flvgvlcdlk 181 kraasfcleq phekvsvvya vymarvveil lekifeirrl ldgnredmfe nfyvliptnn 241 vinklsnpii sanawvdpna vre	full sequence	Exact match	hypothetical protein AAJ76_2000149161 [Nosema ceranae]	XP_024332331.1	A0A0F9ZH36
NCER_101994	XP_002995209.1	Record removed. This record was removed by RefSeq staff.	XP_002995209.1	hypothetical protein NCER_101994 [Nosema ceranae BRL01]	9422571	1 mnllfllncl faeelpsaav gidlgttfcc vsifkegdke tsflqfpnge ytypsvayyn 61 qigdkgvylt gweaythnla navpgryfyg ykrvmgladi selskhekfe nsvtykirkv 121 lengknkief viadknnkel sitdaeklss evlkdirtei ekyykikslv itvpayftsf 181 qidatksaai maslpnpniy keplaaayay qvkknlskds nedkilvfdl gggtfdvsvv 241 dmqgeaiive khagnnylgg envndnltry fgqklkaekk idvtknktle lrlrrfveef 301 kiklcnqytk enkkeysekf nyqnmdtidf sltidkfnsl nskf…	full sequence	Partial match 99%	heat shock protein 70 [Nosema apis BRL 01]	EQB59878.1	T0L570
NCER_102023	XP_002995188.1	Record removed. This record was removed by RefSeq staff.	XP_002995188.1	hypothetical protein NCER_102023 [Nosema ceranae BRL01]	9422542	1 mseqsktsna igidlgttys cvgaymngkv eiitnpdgdr ttpsivafge sgniivgsaa 61 ksmytsdpas vifdakrmig rgfdddnikt ciskwpftvv rynfqtkkee aapvpgsqkv 121 idniaikiek ngktdyyapi eissrvltym kkaaetrlgt kvdsvvvtvp ayfeepqrer 181 tkeaaiiagf kpdnirllae ptaaamaygh kkteenqnie tkedilvfdl gggtfdvsvl 241 dfefstkngs vgvvkatdgn tflggvdfdn lliqyaldef kkknglspqe efkqnsvlrl 301 raevtrvkal lsstdnsqiy vpcfhgtvdl nipitrarfe flcd…	full sequence	Exact match	heat shock protein 70 [Nosema ceranae]	XP_024331167.1	A0A0F9WFB6
alpha,alpha-trehalose-phosphate synthase	XP_392397.3	Record removed. This record was removed as a result of standard genome annotation processing.	XP_392397.3	PREDICTED: alpha,alpha-trehalose-phosphate synthase [UDP-forming] A isoform 2 [Apis mellifera]	408867	1 mrfsagglvt avapvvisgn giwvgwpglh menrdepipe sdpndrtpta gllsrkvvav 61 hvepsifdsy yngccngtfw plfhsmpdra tfiaehwray savneefaak tvraleeihk 121 eqknqpngtp lvwvhdyhlm laanwirqaa dekqlkcklg fflhipfppw difrlfpwad 181 eilqgmlgcd mvgfhiqdyc lnfvdccqrs lgcrvdrknl lvehggrtvr vrplpigipf 241 drfvslaeta nkvistnqki vlgvdrldyt kglvnrlkaf emllekhpeh reqvtmlqia 301 vpsrtdvrey qdlklemdql igringrftt pnwspiryiy gcvs…	full sequence	Partial match 99%	alpha,alpha-trehalose-phosphate synthase [UDP-forming] isoform X2 [Apis mellifera]	XP_026297280.1	Not found
40S ribosomal protein S12	XP_624645.2	Record removed. This record was removed as a result of standard genome annotation processing.	XP_624645.2	PREDICTED: 40S ribosomal protein S12 [Apis mellifera]	552266	1 mlmilfaifs lrhfsffirk vlhslknmsd venddvpsam aaggamdvnt alqevlknal 61 ihdgvvhglh eaakaldkrq amlcilaenc depmykklvq alcnehqipl irvdnnkklg 121 ewaglckids agkarkvvgc scvvikdfge dtpakdvvme yvkqssvh	full sequence	Partial match 87%	40S ribosomal protein S12 isoform X1 [Apis dorsata]	XP_006557554.1	V9ILJ0
